# Supplementary material
Source: Springer Nature journal article supplement (https://www.springermedizin.de/resource/supplementary/12885_2011_2860_MOESM3_ESM.pdf/9462190)

**Cancer treatment-induced**

**bone loss**

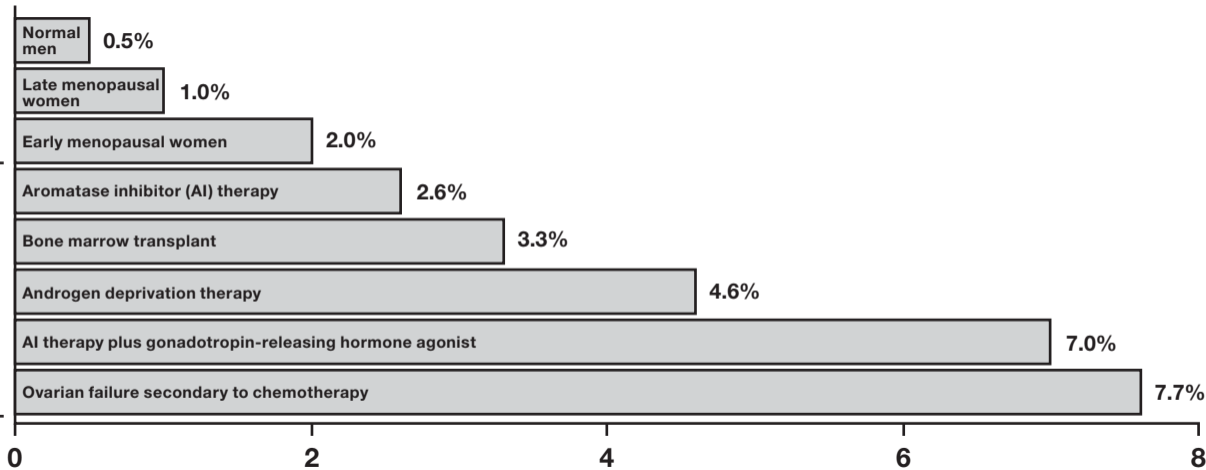

**Lumbar spine BMD loss at 1 year, %**

Supplement: MOESM3 [file 9462190]
